# Supplementary material for: Xanthones and Quinolones Derivatives Produced by the Deep-Sea-Derived Fungus Penicillium sp. SCSIO Ind16F01
Source: MDPI journal article supplement (doi:10.3390/molecules22121999), 2017-12-07

## Xanthenes and quinolones derivatives produced by the deep-sea-derived fungus *Penicillium* sp. SCSIO Ind16F01

Feng-an Liu <sup>1,3</sup>, Xiuping Lin <sup>2,3</sup>, Xuefeng Zhou <sup>2</sup>, Minghao Chen <sup>1</sup>, Xiuling Huang <sup>1</sup>, Bin Yang <sup>2, \*</sup> and Huaming Tao <sup>1, \*</sup>

<sup>1</sup> School of Traditional Chinese Medicine, Southern Medical University, Guangzhou 510515, P. R. China; liufeng.an@outlook.com (F.L.); chen.minghao@haotmail.com (M.C.), 920205937@qq.com (X.H.)

<sup>2</sup> CAS Key Laboratory of Tropical Marine Bio-resources and Ecology / Guangdong Key Laboratory of Marine Materia Medica, South China Sea Institute of Oceanology, Chinese Academy of Sciences, Guangzhou 510301, P. R. China; xiupinglin@hotmail.com (X.L.); xfzhou@scsio.ac.cn (X.Z.)

<sup>3</sup> These two authors contributed equally to this work.

\* Correspondence: taohm@smu.edu.cn (T. H.); bingo525@163.com (B.Y.); Tel.: +86-20-89023174

Academic Editor: name

Received: date; Accepted: date; Published: date

**Abstract:** Chemical investigation of the fungus *Penicillium* sp. SCSIO Ind16F01 derived from deep-sea sediment sample afforded a new xanthone, 3,8-dihydroxy-2-methyl-9-oxoxanthene-4-carboxylic acid methyl ester (**1**) and a new chromone, coniochaetone J (**2**), together with three known xanthenes, 8-hydroxy-6-methyl-9-oxo-9H-xanthene-1-carboxylic acid methyl ester (**3**), 7,8-dihydroxy-6-methyl-9-oxo-9H-xanthene-1-carboxylic acid methyl ester (**4**), 1,6,8-trihydroxy-3-(hydroxymethyl)anthraquinone (**5**), three known chromones, coniochaetone B (**6**), citrinolactones B (**7**), epiremisporsine B (**8**), and four reported rare class of *N*-methyl quinolone lactams: quinolactacins B (**9**), C1 (**10**), and C2 (**11**), and quinolonimide (**12**). The structures of new compounds were determined by analysis of the NMR and MS spectroscopic data. Those isolated compounds were evaluated for their antiviral (EV71 and H3N2) and cytotoxic activities.

**Keywords:** marine-derived fungus; *Penicillium* sp. SCSIO Ind16F01; xanthone; chromone; *N*-methyl quinolone lactams.

## **List of supporting information**

**Table S1.** antiviral (H3N2 and EV71) and cytotoxic activities of Compounds **1–12**.

**S1:**  $^1\text{H}$ -NMR (500 MHz,  $\text{DMSO-}d_6$ ) Spectrum of Compound **1**

**S2:**  $^{13}\text{C}$ -NMR (125 MHz,  $\text{DMSO-}d_6$ ) Spectrum of Compound **1**

**S3:** Comparison the  $^1\text{H}$ -NMR Spectrum of **1** in  $\text{CDCl}_3$  and in  $\text{DMSO-}d_6$

**S4:** Comparison the  $^{13}\text{C}$ -NMR Spectrum of **1** in  $\text{CDCl}_3$  and in  $\text{DMSO-}d_6$

**S5:** HMQC (500 MHz) Spectrum of Compound **1**

**S6:** HMBC (500 MHz) Spectrum of Compound **1**

**S7:** HRESI-MS Spectrum of Compound **1**

**S8:** IR Spectrum of Compound **1**

**S9:** UV Spectrum of Compound **1**

**S10:** EI-MS Spectrum of Compound **1**

**S11:**  $^1\text{H}$ -NMR (500 MHz,  $\text{CDCl}_3$ ) Spectrum of Compound **2**

**S12:**  $^{13}\text{C}$ -NMR (125 MHz,  $\text{CDCl}_3$ ) Spectrum of Compound **2**

**S13:** HMQC (500 MHz) Spectrum of Compound **2**

**S14:** HMBC (500 MHz) Spectrum of Compound **2**

**S15:** HRESI-MS Spectrum of Compound **2**

**S16:** IR Spectrum of Compound **2**

**S17:** UV Spectrum of Compound **2**

**S18:**  $^1\text{H}$ - and  $^{13}\text{C}$ -NMR Spectrum of Compound **3**

**S19:**  $^1\text{H}$ - and  $^{13}\text{C}$ -NMR Spectrum of Compound **4**

**S20:**  $^1\text{H}$ - and  $^{13}\text{C}$ -NMR Spectrum of Compound **5**

**S21:**  $^1\text{H}$ - and  $^{13}\text{C}$ -NMR Spectrum of Compound **6**

**S22:**  $^1\text{H}$ - and  $^{13}\text{C}$ -NMR Spectrum of Compound **7**

**S23:**  $^1\text{H}$ - and  $^{13}\text{C}$ -NMR Spectrum of Compound **8**

**S24:**  $^1\text{H}$ - and  $^{13}\text{C}$ -NMR Spectrum of Compound **9**

**S25:** Comparing  $^1\text{H}$ -NMR Spectrum of Compounds **9** and **10**

**S26:**  $^1\text{H}$ - and  $^{13}\text{C}$ -NMR Spectrum of Compound **11**

**S27:**  $^1\text{H}$ - and  $^{13}\text{C}$ -NMR Spectrum of Compound **12**

**Table S1.** antiviral (H3N2 and EV71) and cytotoxic activities of Compounds 1–12

| compounds | cytotoxic activities           |          |                            |          |                            |          | anti-enterovirus 71            |          | anti-H3N2                      |          |
|-----------|--------------------------------|----------|----------------------------|----------|----------------------------|----------|--------------------------------|----------|--------------------------------|----------|
|           | K562                           |          | MCF-7                      |          | SGC7901                    |          |                                |          |                                |          |
|           | Inhibition<br>rate %<br>(30μM) | IC50     | Inhibition<br>rate %(30μM) | IC50     | Inhibition<br>rate %(30μM) | IC50     | Inhibition<br>rate %<br>(30μM) | IC50     | Inhibition<br>rate %<br>(30μM) | IC50     |
| 1         | 97.88                          | ND       | 101.08                     | ND       | 85.29                      | ND       | -12.21                         | ND       | -4.9                           | ND       |
| 2         | 102.49                         | ND       | 96.48                      | ND       | 93.92                      | ND       | 37.25                          | 8.16E-05 | 10.4                           | ND       |
| 3         | 107.53                         | ND       | 101.59                     | ND       | 103.80                     | ND       | 0.94                           | ND       | -5.0                           | ND       |
| 4         | 104.51                         | ND       | 123.27                     | ND       | 107.97                     | ND       | -5.93                          | ND       | -6.0                           | ND       |
| 5         | 113.21                         | ND       | 109.80                     | ND       | 110.74                     | ND       | 8.50                           | ND       | -0.9                           | ND       |
| 6         | 95.37                          | ND       | 104.47                     | ND       | 96.73                      | ND       | 5.59                           | ND       | -4.1                           | ND       |
| 7         | 102.13                         | ND       | 121.25                     | ND       | 98.51                      | ND       | 6.68                           | ND       | -3.3                           | ND       |
| 8         | 3.11                           | 1.67E-05 | -0.98                      | 1.63E-05 | 3.46                       | 1.58E-05 | 88.21                          | 1.98E-05 | 91.5                           | 2.41E-05 |
| 9         | 109.48                         | ND       | 104.61                     | ND       | 93.79                      | ND       | 6.76                           | ND       | -0.7                           | ND       |
| 10        | 114.17                         | ND       | 120.96                     | ND       | 99.99                      | ND       | 11.49                          | ND       | 9.3                            | ND       |
| 11        | 111.19                         | ND       | 113.40                     | ND       | 104.15                     | ND       | -2.74                          | ND       | -5.3                           | ND       |
| 12        | 102.92                         | ND       | 105.77                     | ND       | 102.63                     | ND       | 1.13                           | ND       | 1.8                            | ND       |



**S1:**  $^1\text{H}$ -NMR (500 MHz, DMSO- $d_6$ ) Spectrum of Compound **1**

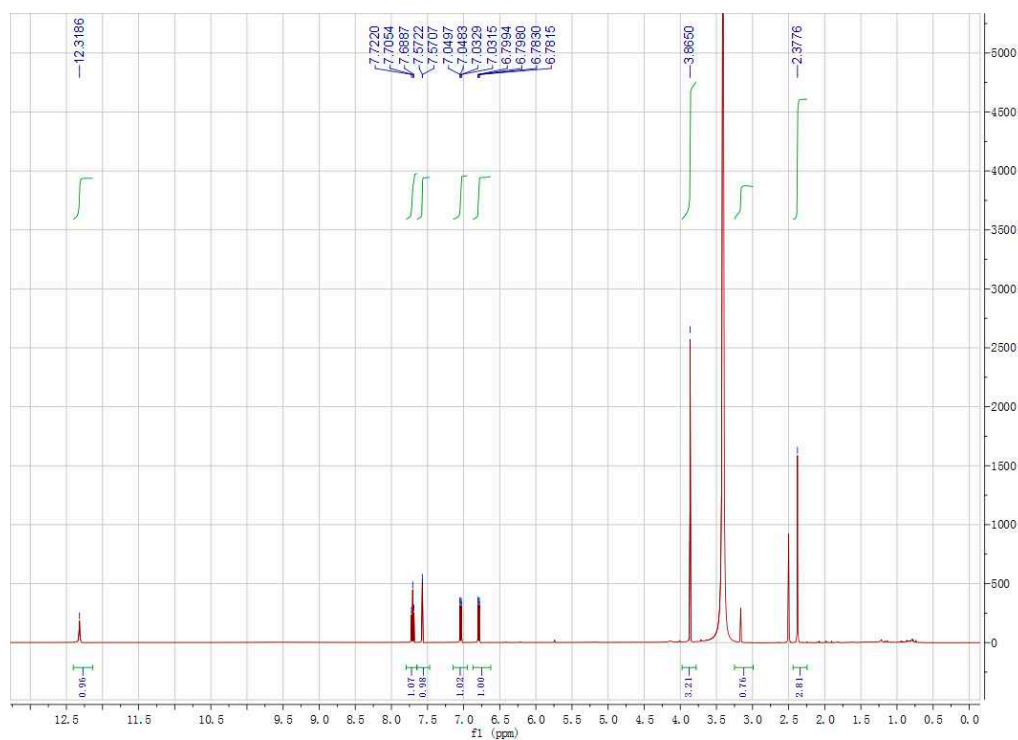

**S2:**  $^{13}\text{C}$ -NMR (125 MHz, DMSO- $d_6$ ) Spectrum of Compound **1**

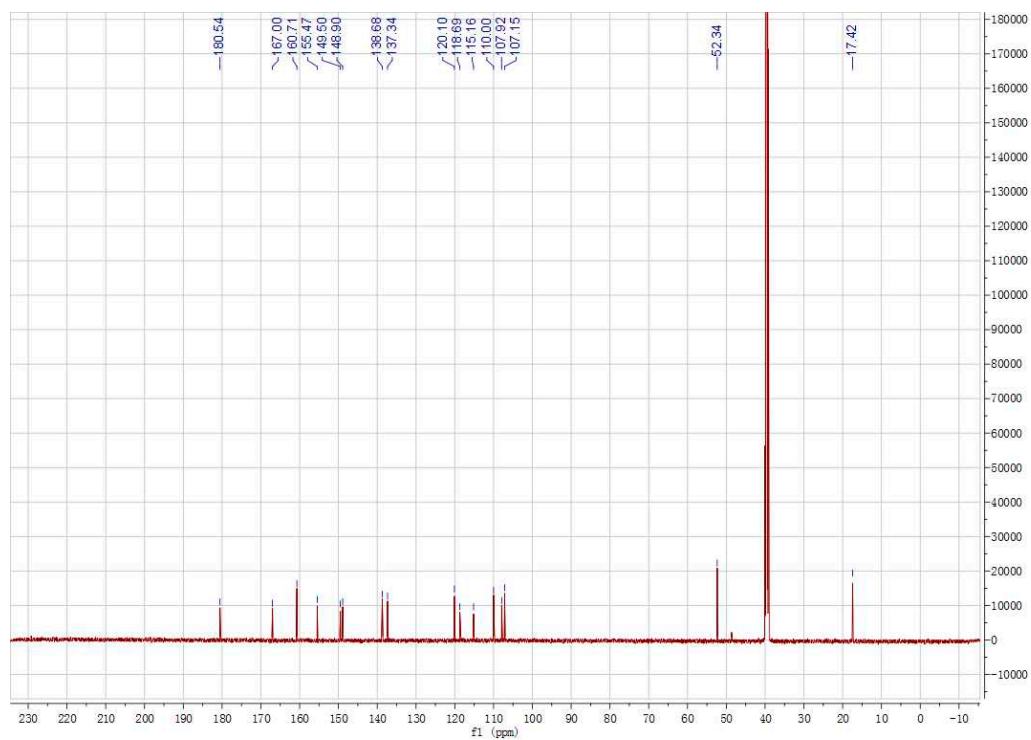

S3: Comparison the  $^1\text{H}$ -NMR Spectrum of 1 in  $\text{CDCl}_3$  and in  $\text{DMSO}-d_6$

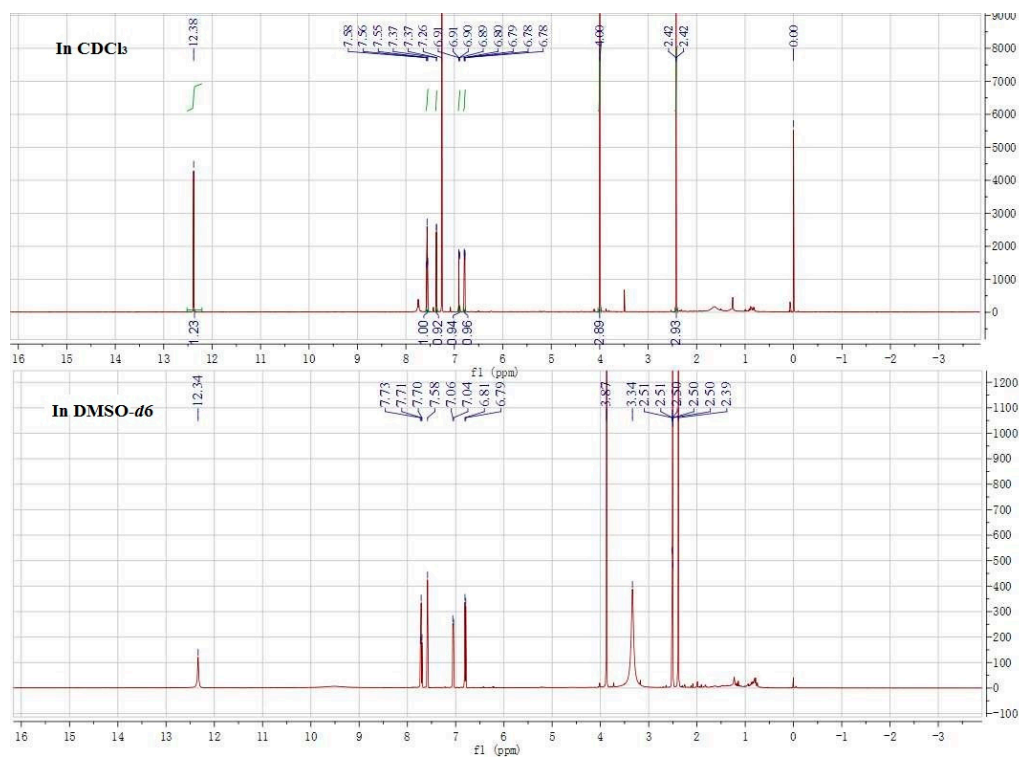

S4: Comparison the  $^{13}\text{C}$ -NMR Spectrum of 1 in  $\text{CDCl}_3$  and in  $\text{DMSO}-d_6$

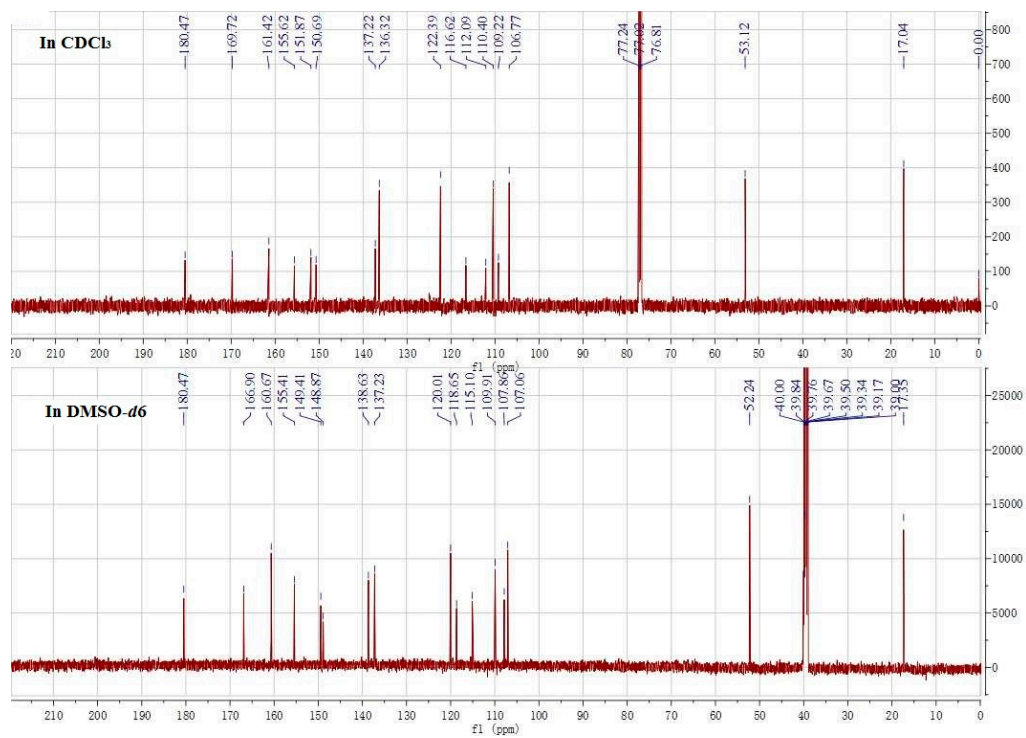

**S5: HMQC (500 MHz) Spectrum of Compound 1**

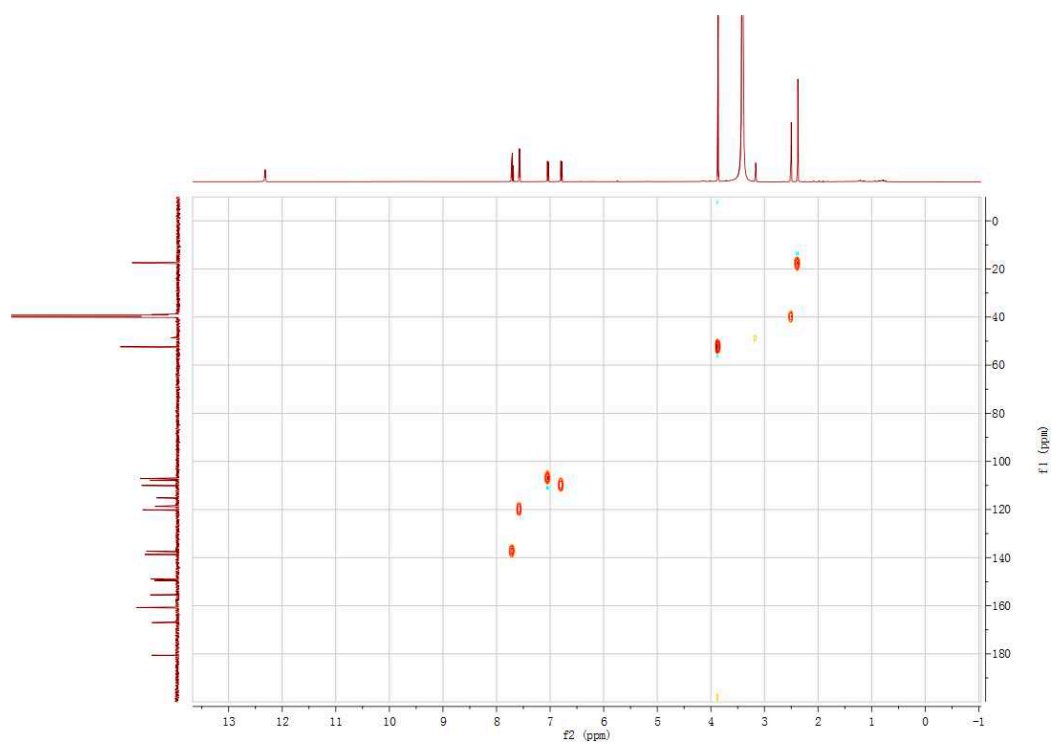

**S6: HMBC (500 MHz) Spectrum of Compound 1**

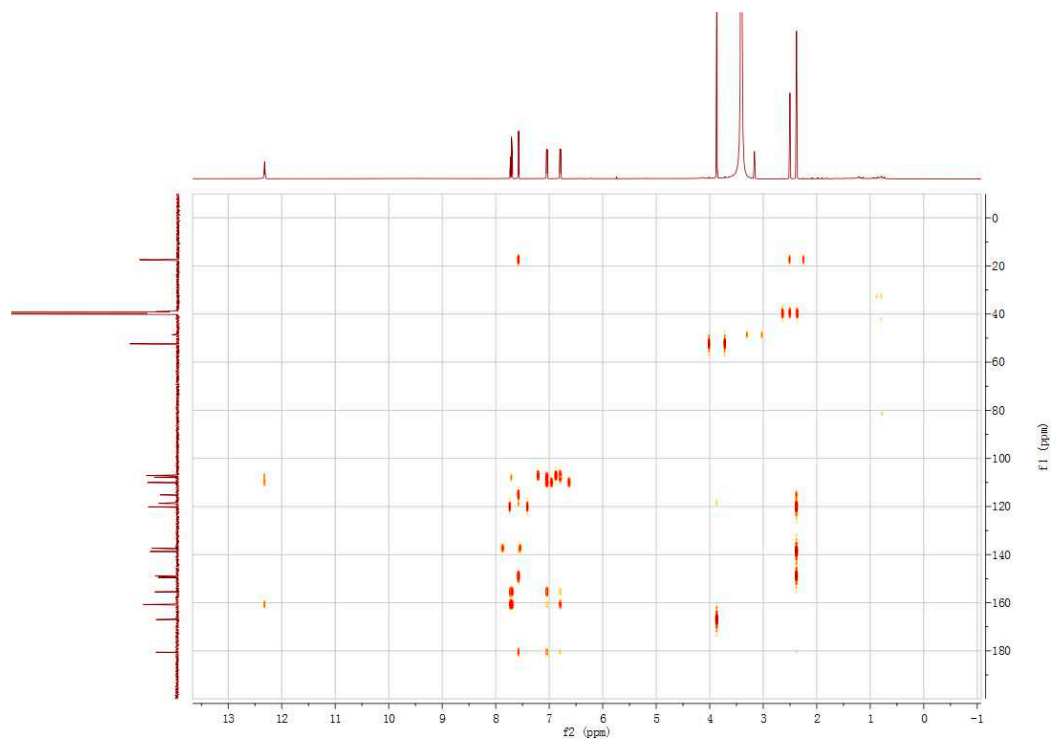



## S7: HRESI-MS Spectrum of Compound 1

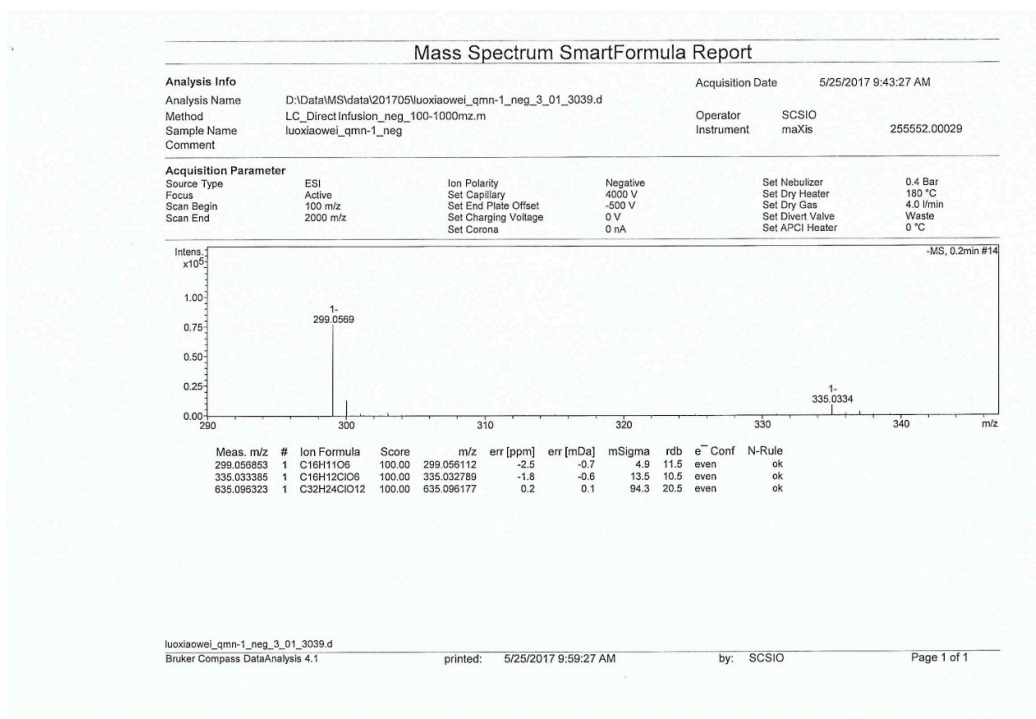

## S8: IR Spectrum of Compound 1

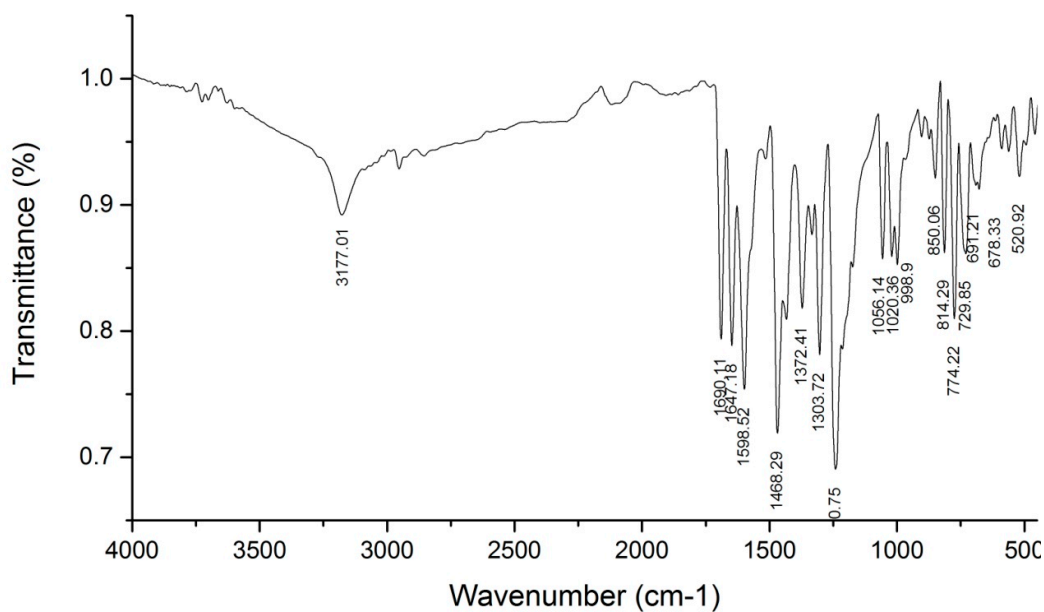

### S9: UV Spectrum of Compound 1

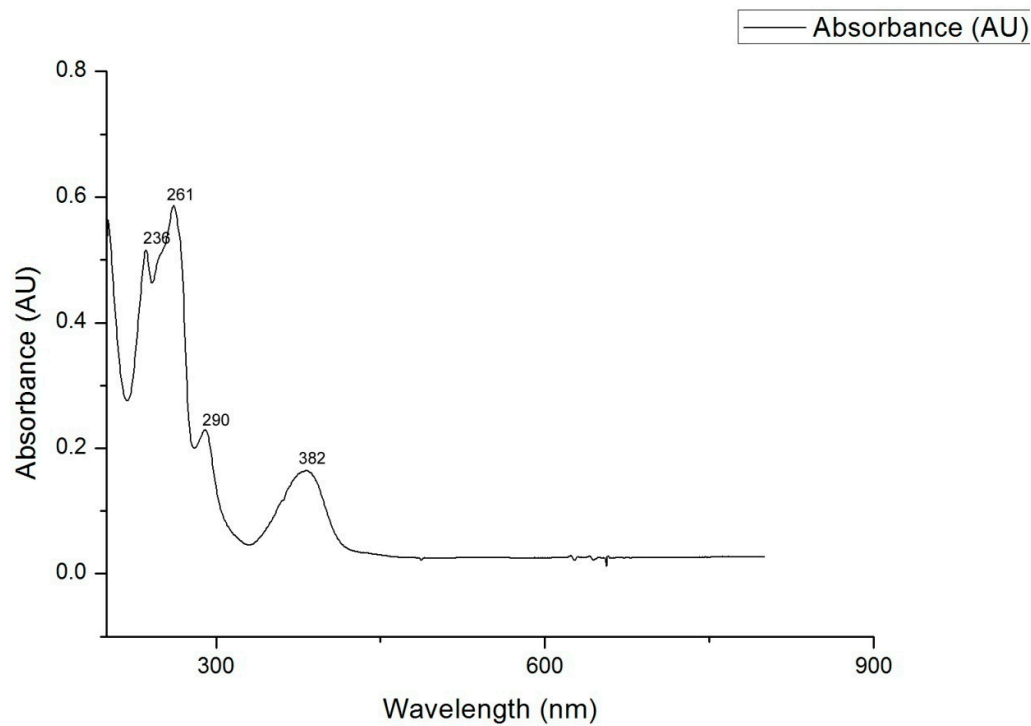

### S10: EI-MS Spectrum of Compound 1

Instrument: DSQ (Thermo)

Ionization Method: EI

D:\DSQ\DATA-LR\171101102

10/11/2017 4:57:30 PM

qmn-1

101102 #45 RT: 1.17 AV: 1 NL: 9.00E6

T: + c Full ms [45.00-800.00]

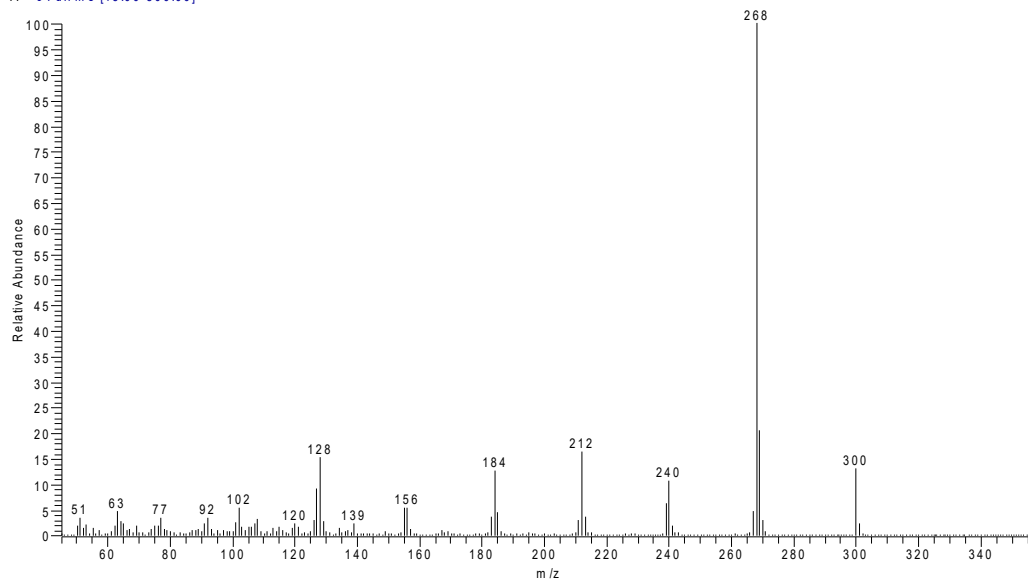

**S11:**  $^1\text{H}$ -NMR (500 MHz,  $\text{CDCl}_3$ ) Spectrum of Compound **2**

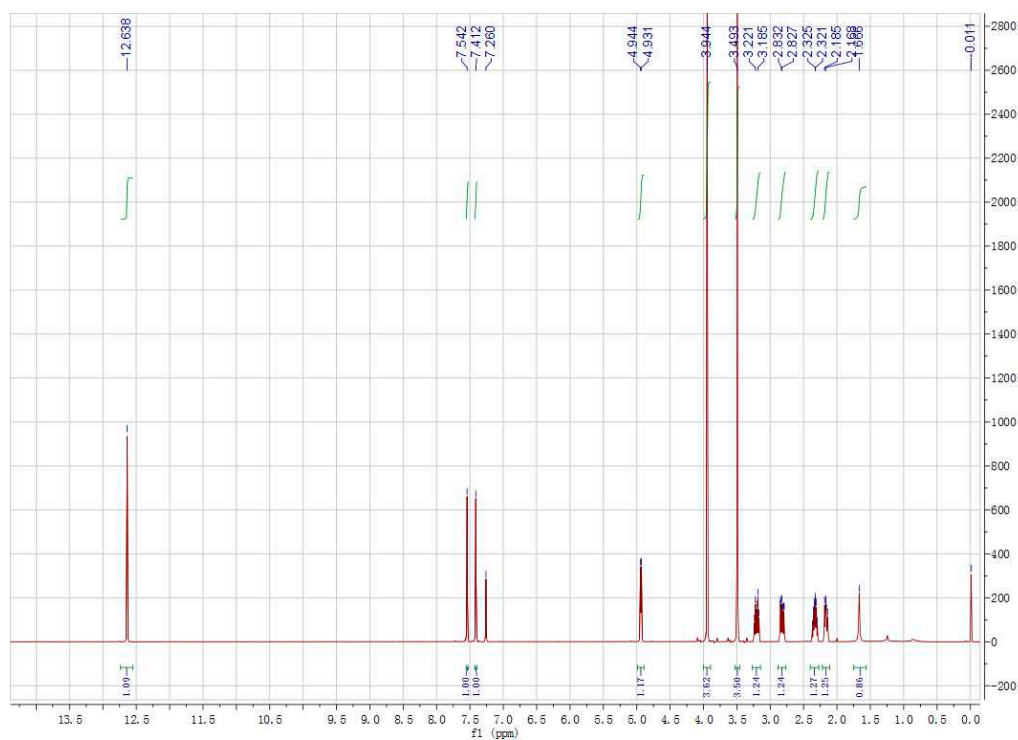

**S12:**  $^{13}\text{C}$ -NMR (125 MHz,  $\text{CDCl}_3$ ) Spectrum of Compound **2**

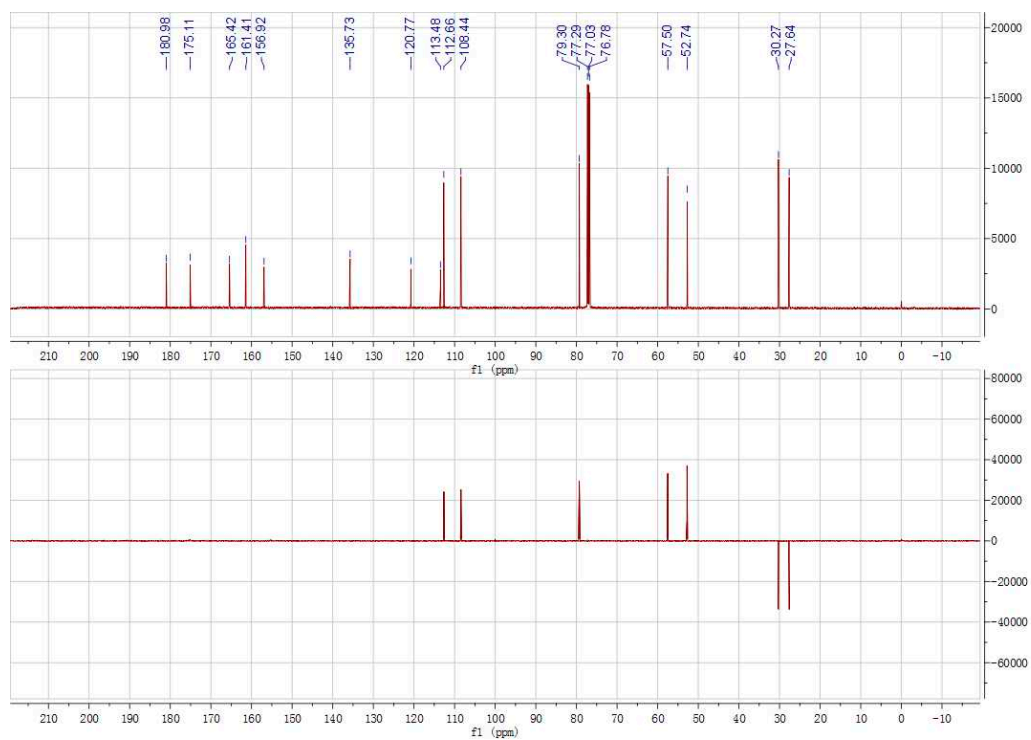

**S13: HMQC (500 MHz) Spectrum of Compound 2**

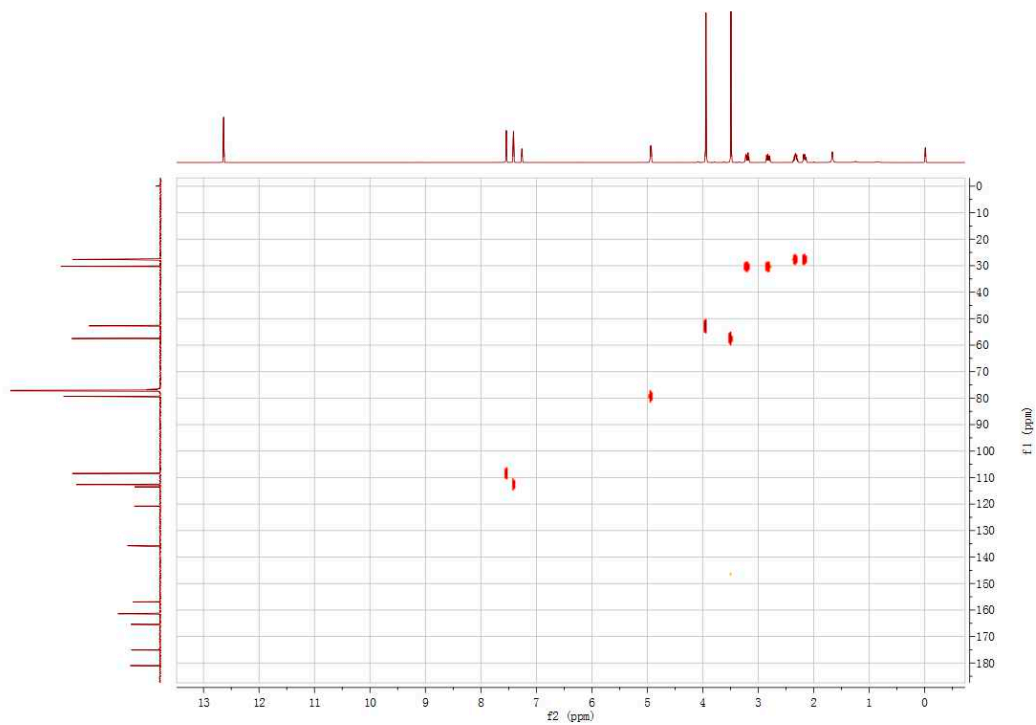

**S14: HMBC (500 MHz) Spectrum of Compound 2**

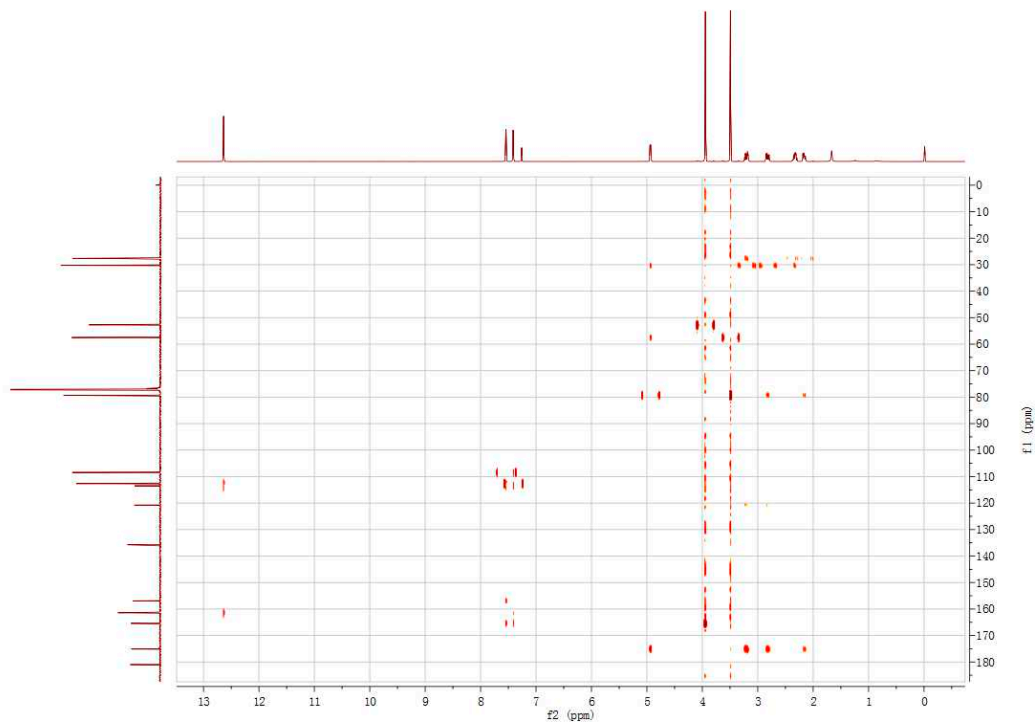

## S15: HRESI-MS Spectrum of Compound 2

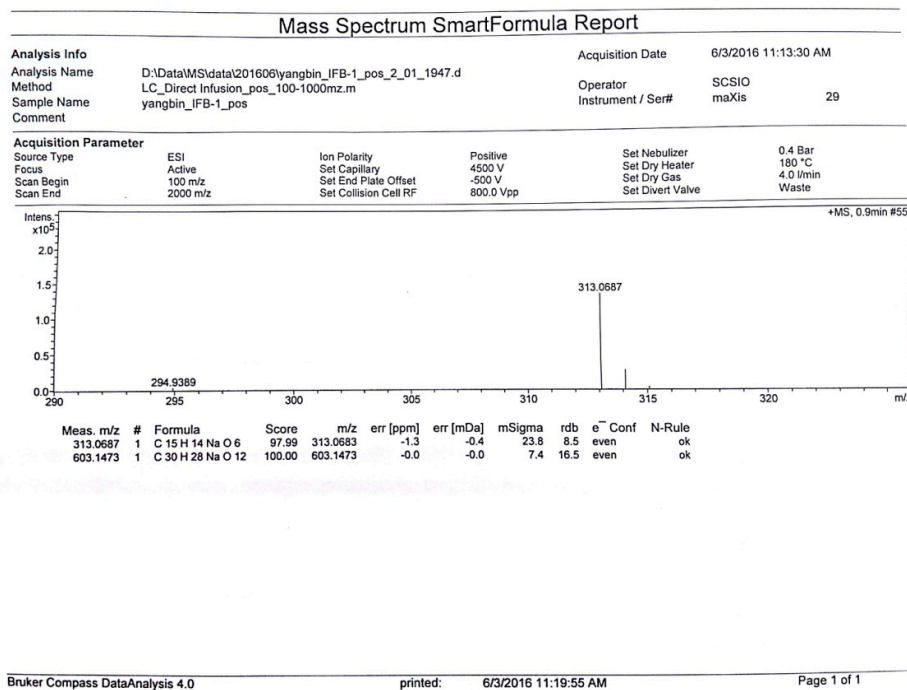

## S16: IR Spectrum of Compound 2

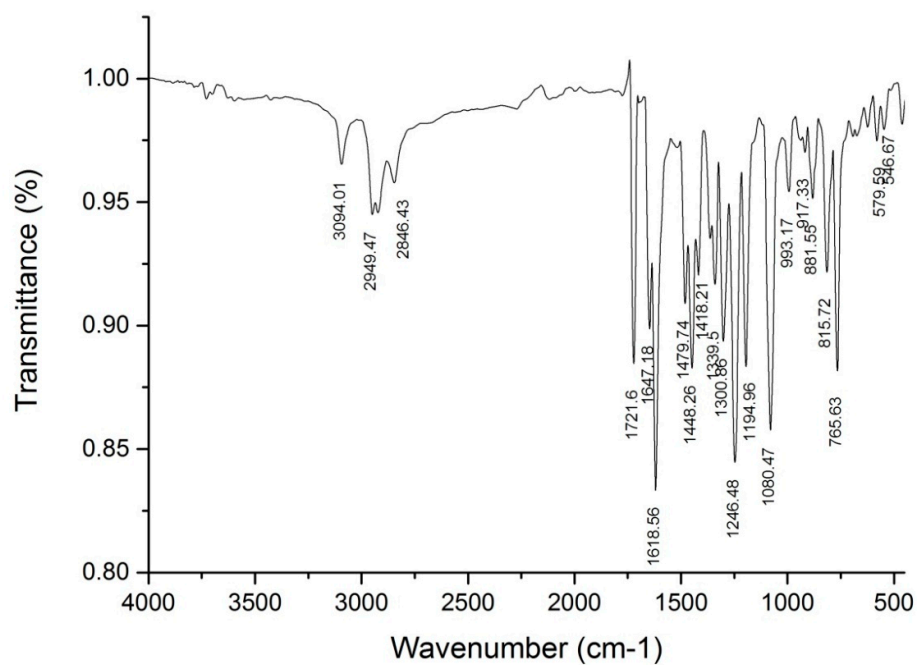

**S17: UV Spectrum of Compound 2**

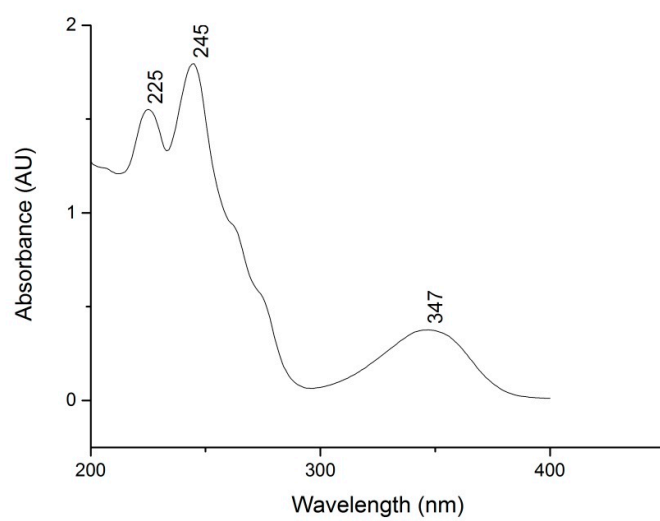

**S18:**  $^1\text{H}$ - and  $^{13}\text{C}$ -NMR Spectrum of Compound **3**

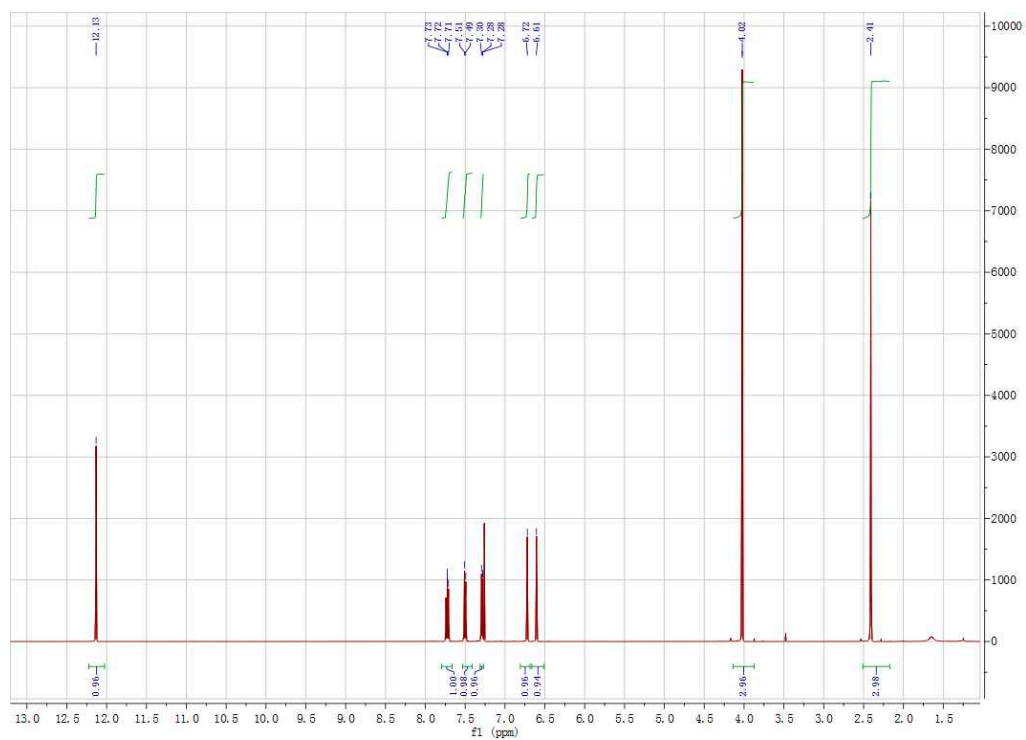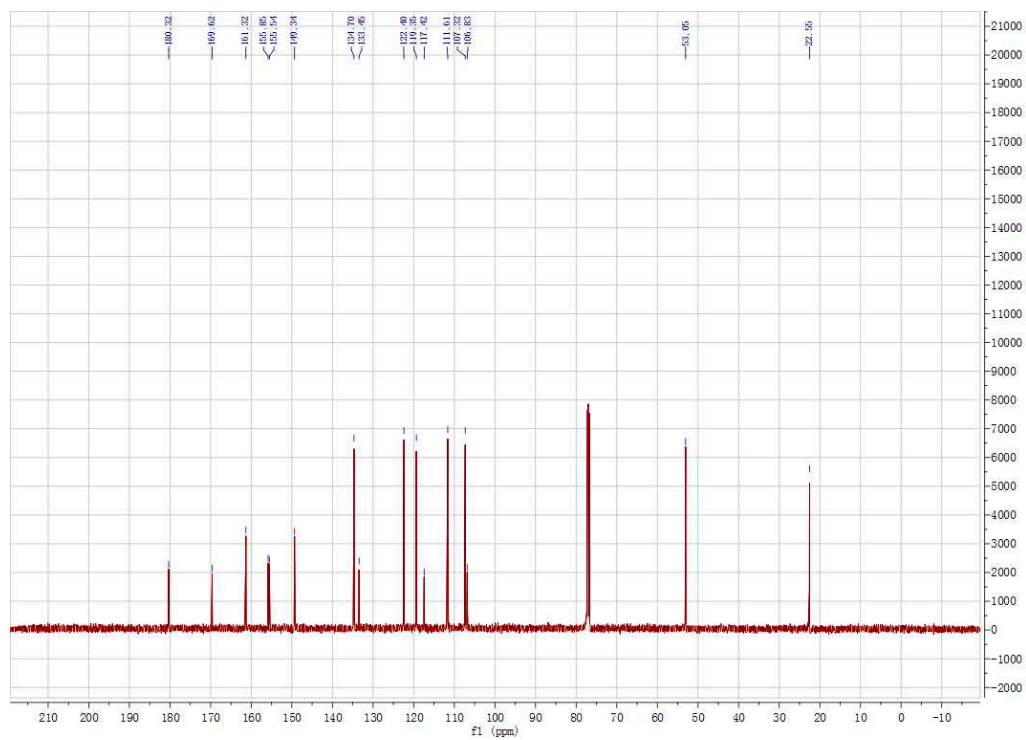

**S19:  $^1\text{H}$ - and  $^{13}\text{C}$ -NMR Spectrum of Compound 4**

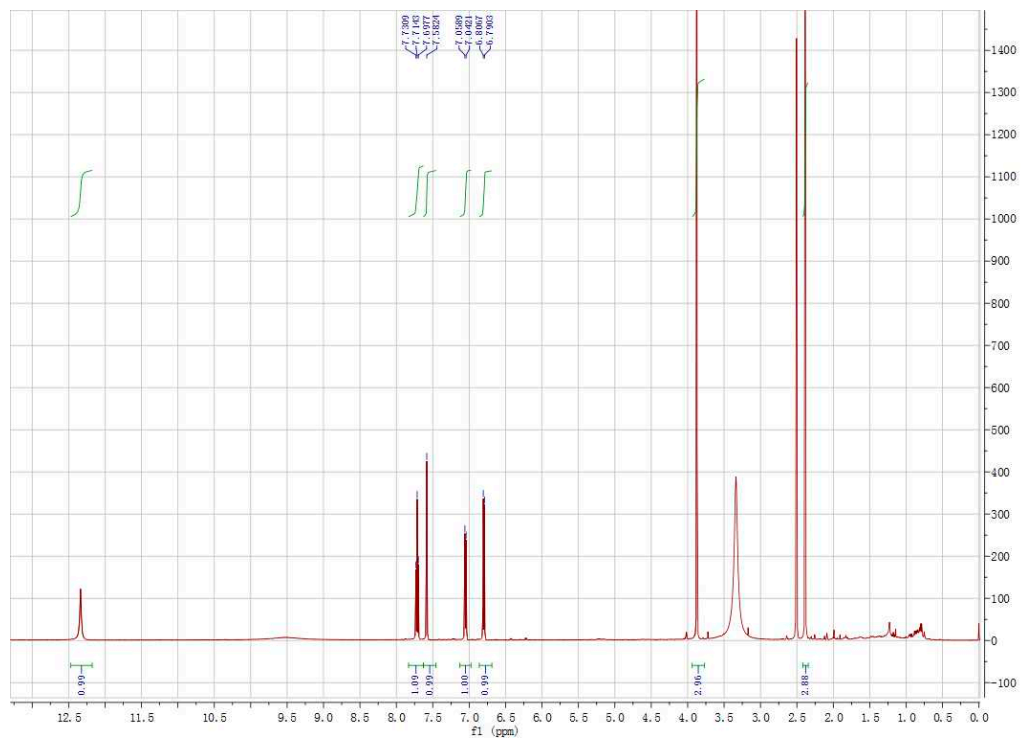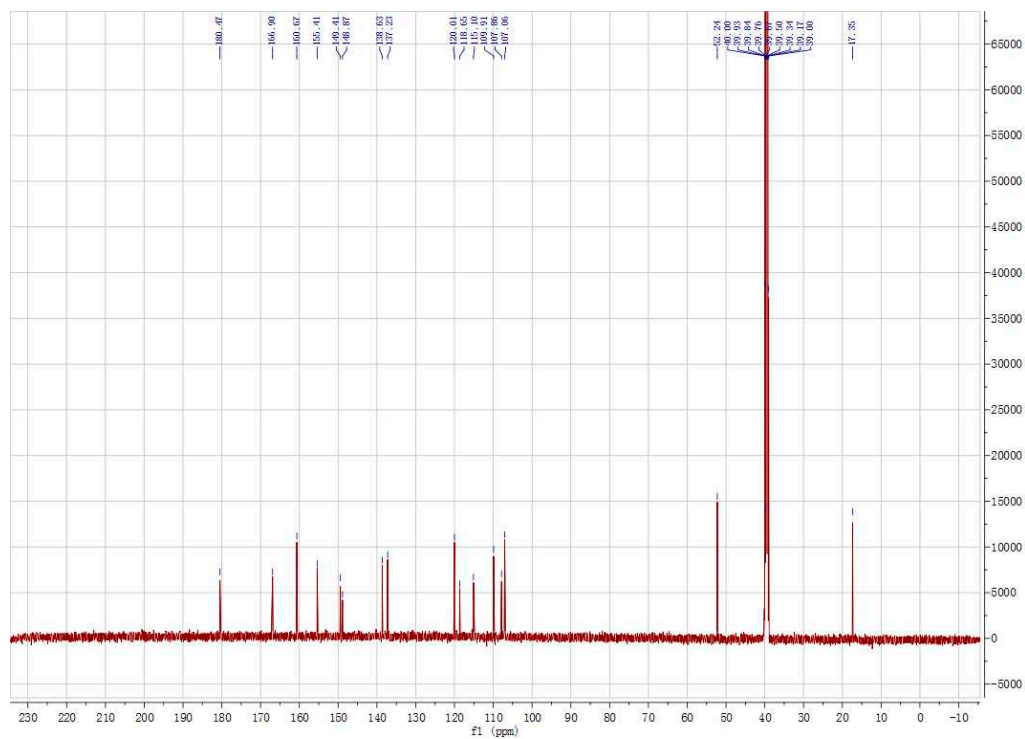



**S20:**  $^1\text{H}$ - and  $^{13}\text{C}$ -NMR Spectrum of Compound **5**

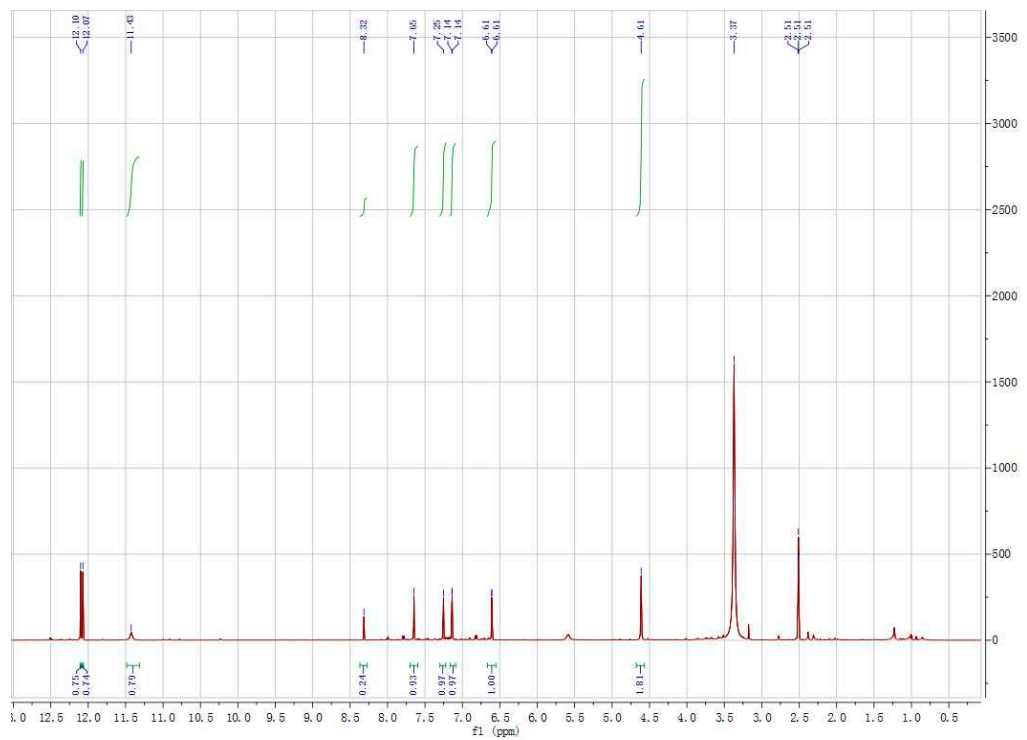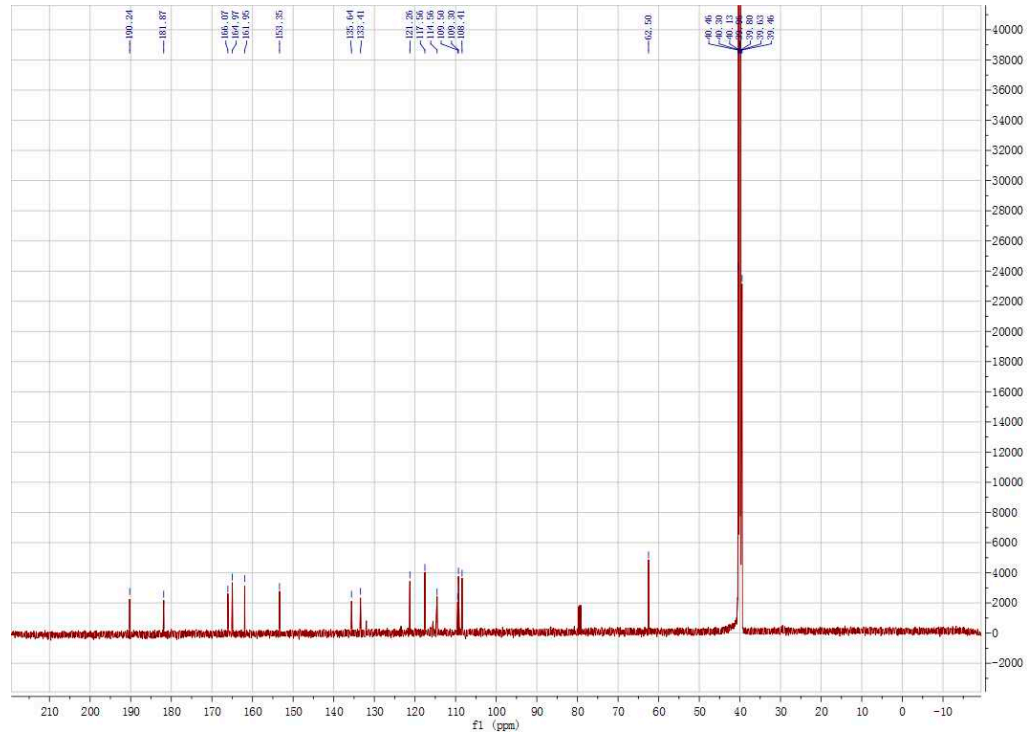

**S21:  $^1\text{H}$ - and  $^{13}\text{C}$ -NMR Spectrum of Compound 6**

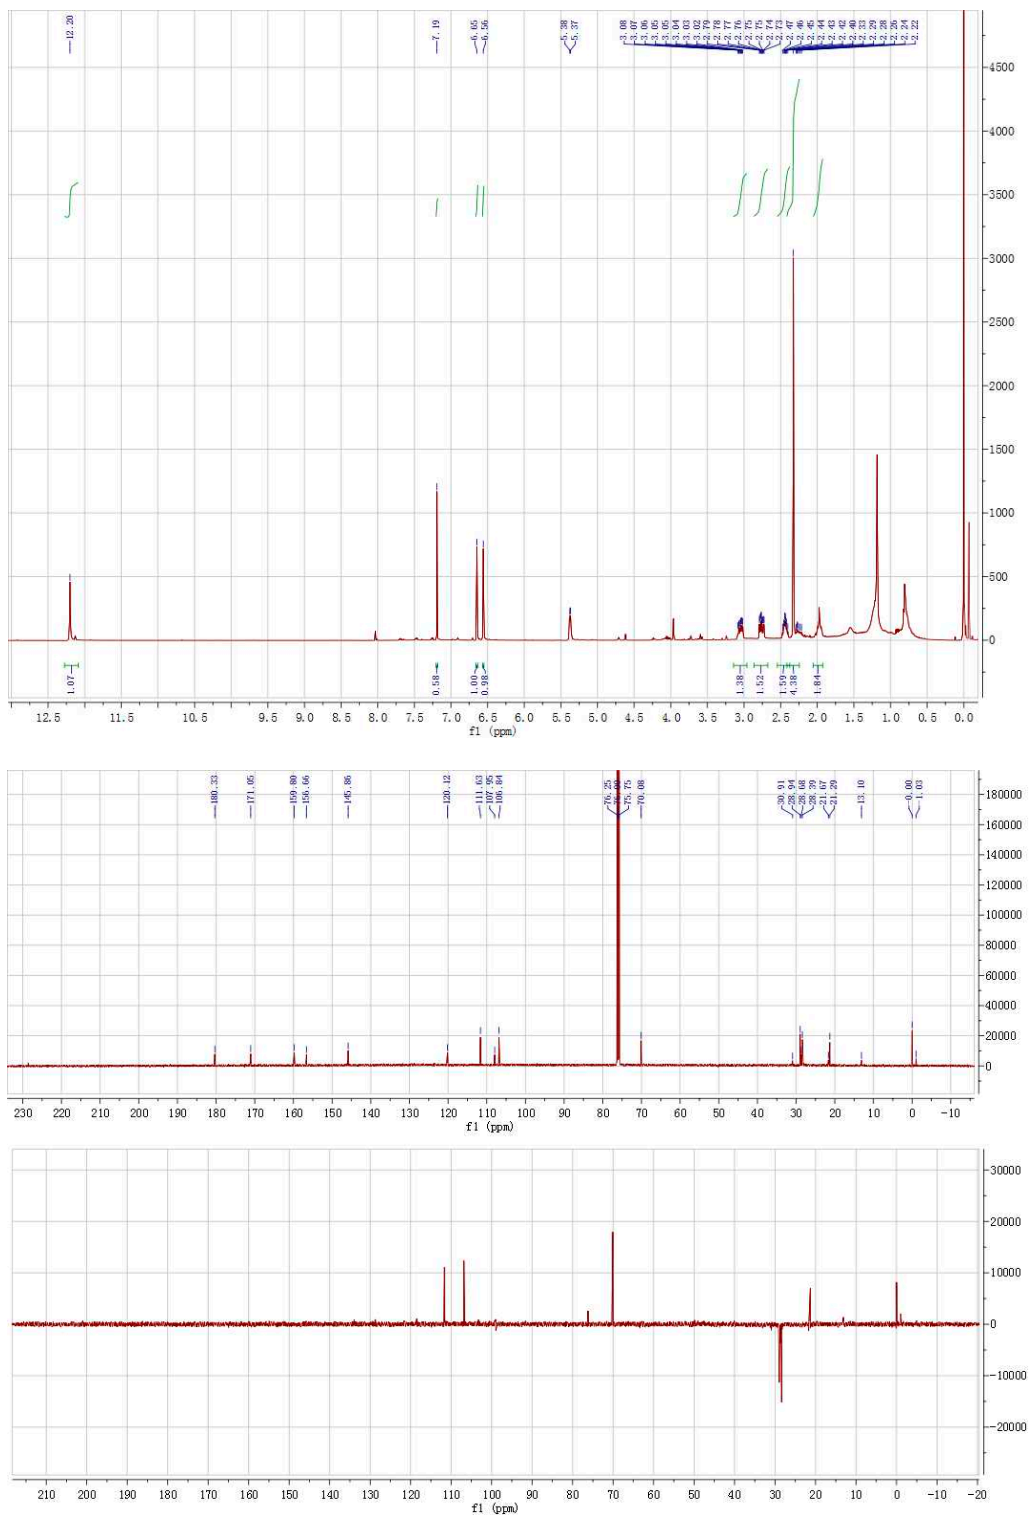

**S22:**  $^1\text{H}$ - and  $^{13}\text{C}$ -NMR Spectrum of Compound **7**

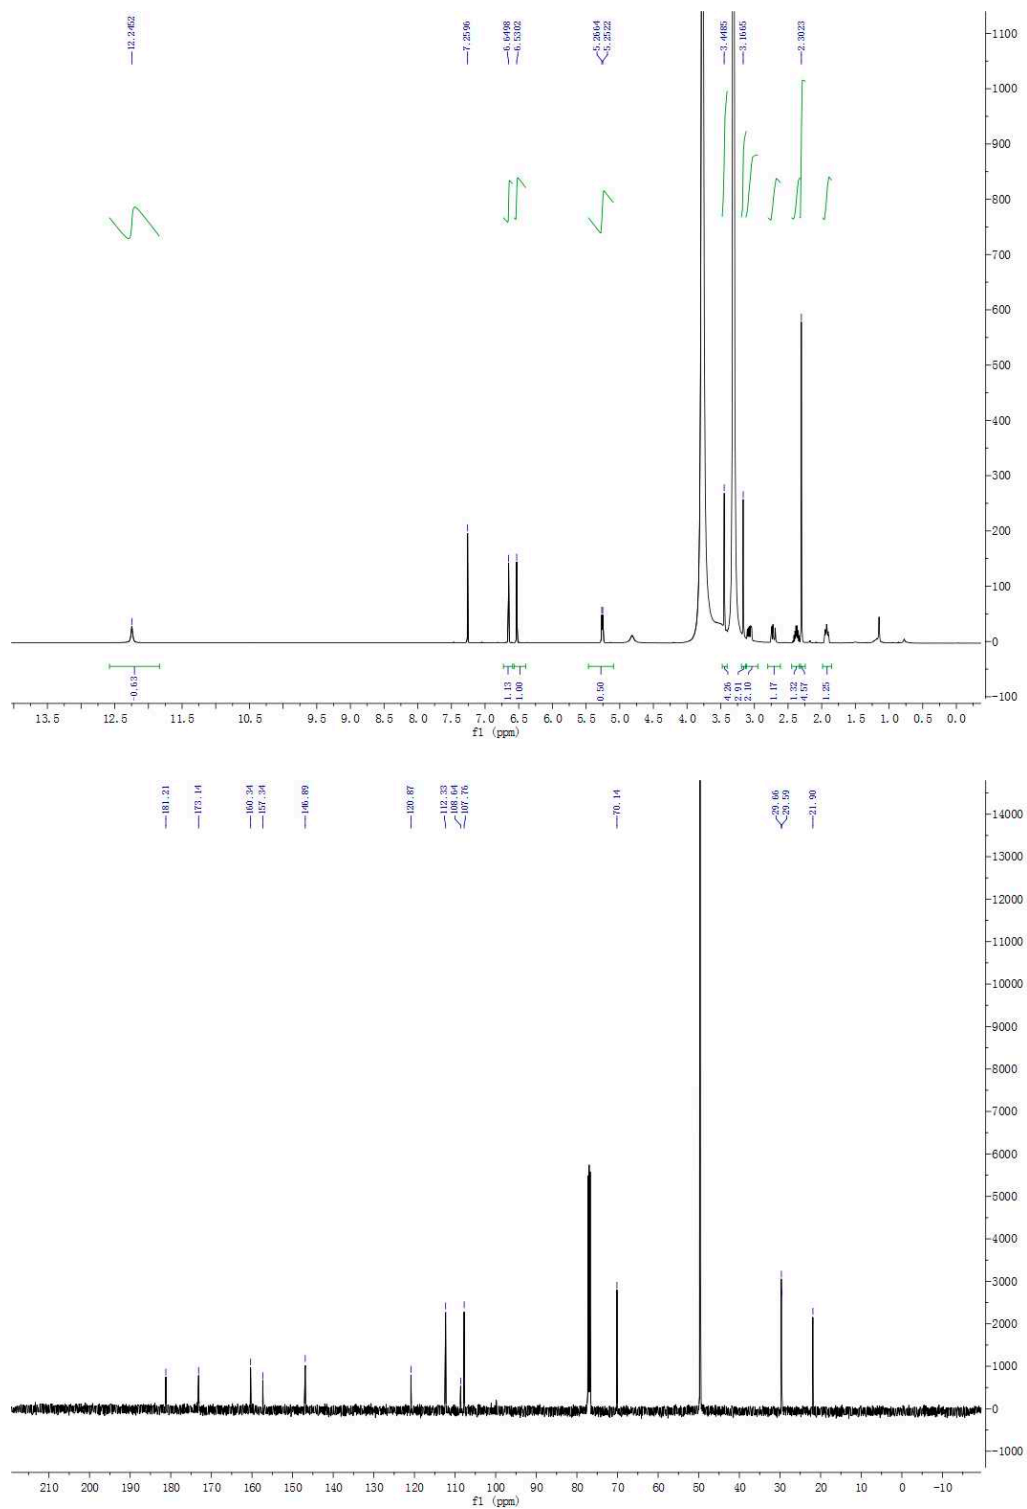

**S23:  $^1\text{H}$ - and  $^{13}\text{C}$ -NMR Spectrum of Compound 8**

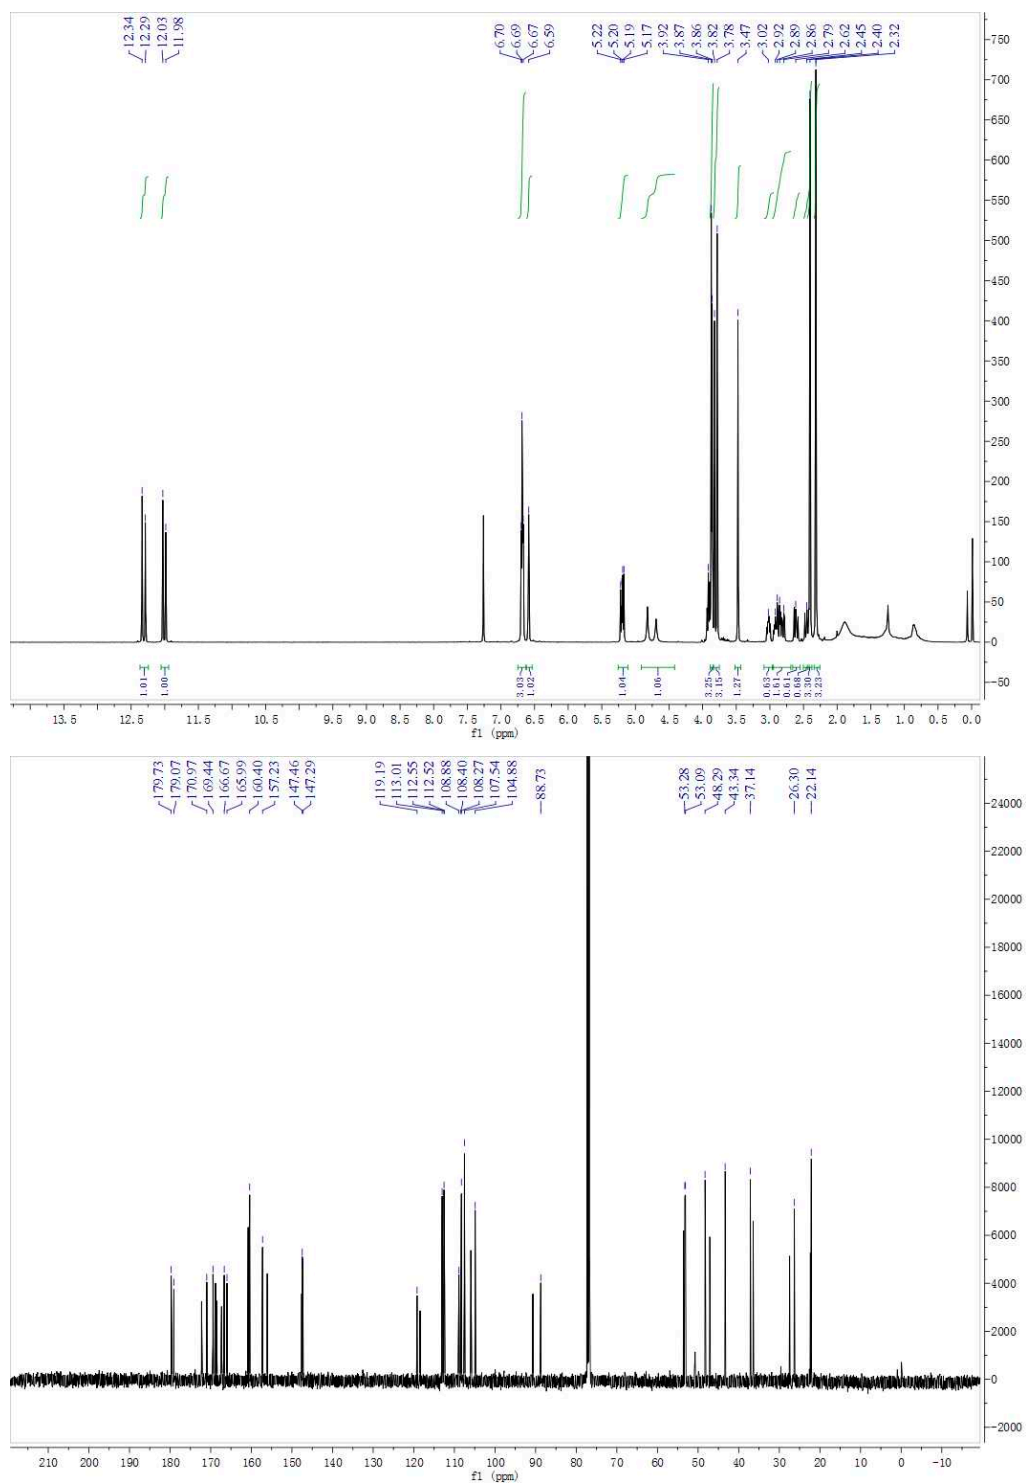

**S24:**  $^1\text{H}$ - and  $^{13}\text{C}$ -NMR Spectrum of Compound **9**

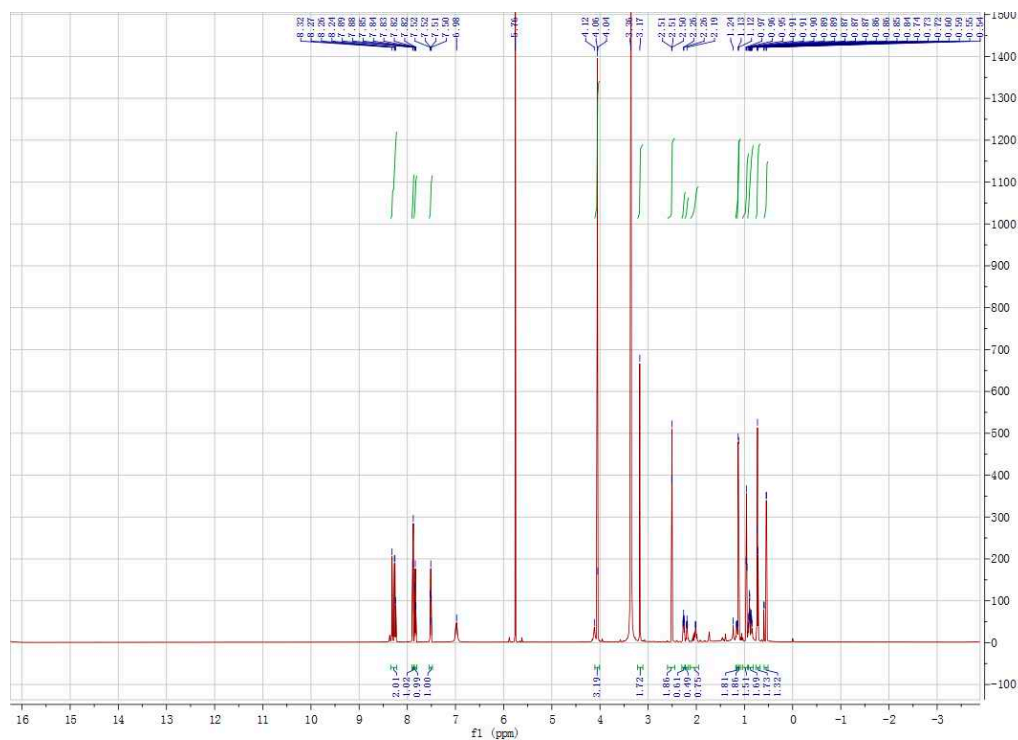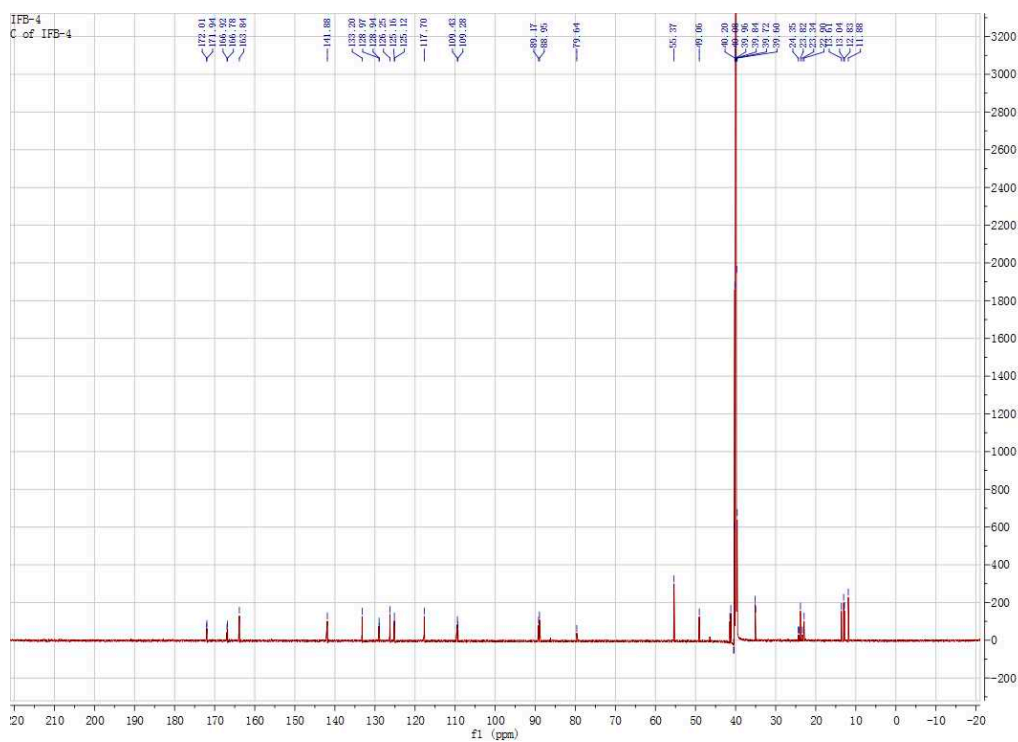

The figure displays two stacked  $^1\text{H}$  NMR spectra of compound **1**. The x-axis represents the chemical shift in ppm, ranging from 9.0 to 0.0. The top spectrum is the experimental data, and the bottom spectrum is the simulated data. Both spectra show a complex aromatic region between 6.5 and 8.5 ppm, a methoxy singlet at approximately 3.8 ppm, a methoxy doublet at approximately 3.4 ppm, and aliphatic peaks between 0.5 and 2.5 ppm. Integration values are provided for each peak, indicating the relative number of protons contributing to each signal.

**Experimental Spectrum (Top):**

- Peak at ~8.4 ppm: Integration 1.83
- Peak at ~8.1 ppm: Integration 0.56
- Peak at ~7.8 ppm: Integration 0.56
- Peak at ~7.5 ppm: Integration 0.80
- Peak at ~7.1 ppm: Integration 0.38
- Peak at ~5.7 ppm: Integration 2.66
- Peak at ~4.0 ppm: Integration 2.09
- Peak at ~3.8 ppm: Integration 4.16
- Peak at ~2.5 ppm: Integration 1.13
- Peak at ~2.1 ppm: Integration 0.10
- Peak at ~1.1 ppm: Integration 1.13
- Peak at ~0.9 ppm: Integration 0.77
- Peak at ~0.7 ppm: Integration 2.56
- Peak at ~0.5 ppm: Integration 2.53

**Simulated Spectrum (Bottom):**

- Peak at ~8.4 ppm: Integration 0.58
- Peak at ~8.1 ppm: Integration 0.56
- Peak at ~7.8 ppm: Integration 0.56
- Peak at ~7.5 ppm: Integration 0.80
- Peak at ~7.1 ppm: Integration 0.38
- Peak at ~5.7 ppm: Integration 1.57
- Peak at ~4.0 ppm: Integration 2.51
- Peak at ~3.8 ppm: Integration 4.56
- Peak at ~3.4 ppm: Integration 1.51
- Peak at ~2.5 ppm: Integration 0.97
- Peak at ~2.1 ppm: Integration 0.03
- Peak at ~1.1 ppm: Integration 1.13
- Peak at ~0.9 ppm: Integration 0.77
- Peak at ~0.7 ppm: Integration 2.56
- Peak at ~0.5 ppm: Integration 2.53

**S26:  $^1\text{H}$ - and  $^{13}\text{C}$ -NMR Spectrum of Compound 11**

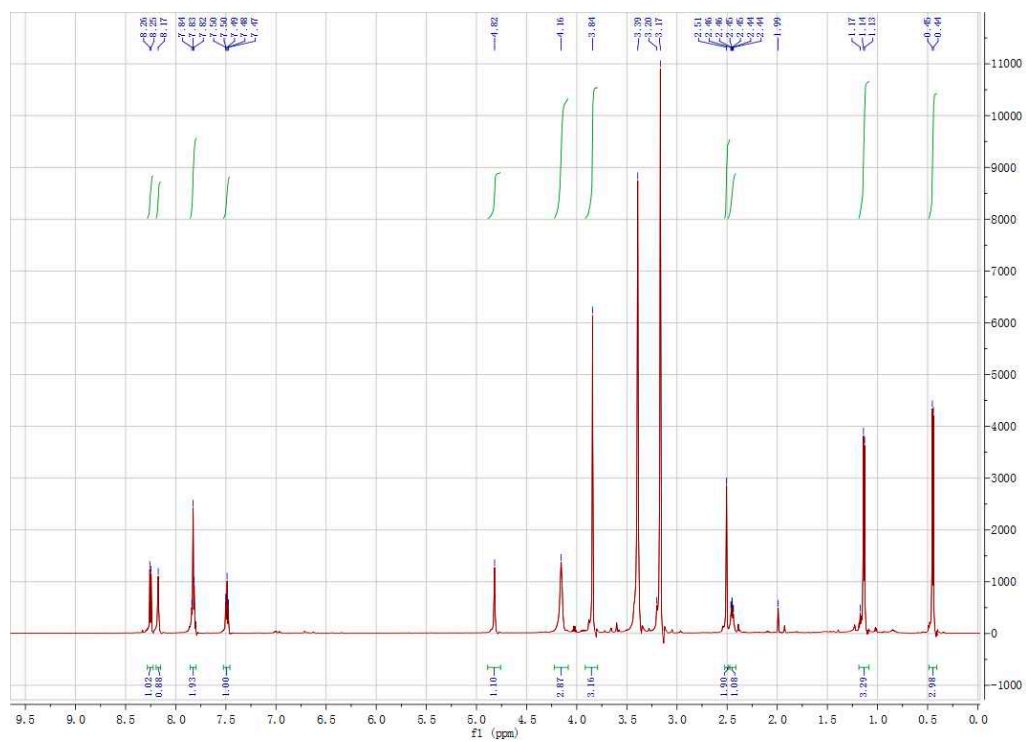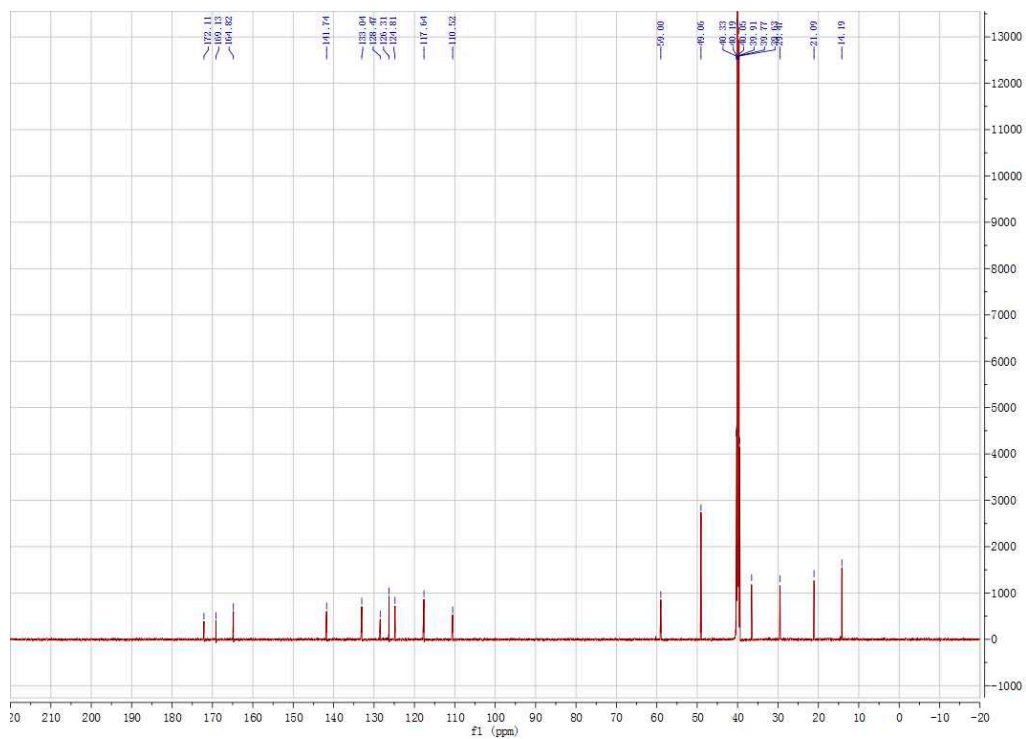

**S27:  $^1\text{H}$ - and  $^{13}\text{C}$ -NMR Spectrum of Compound 12**

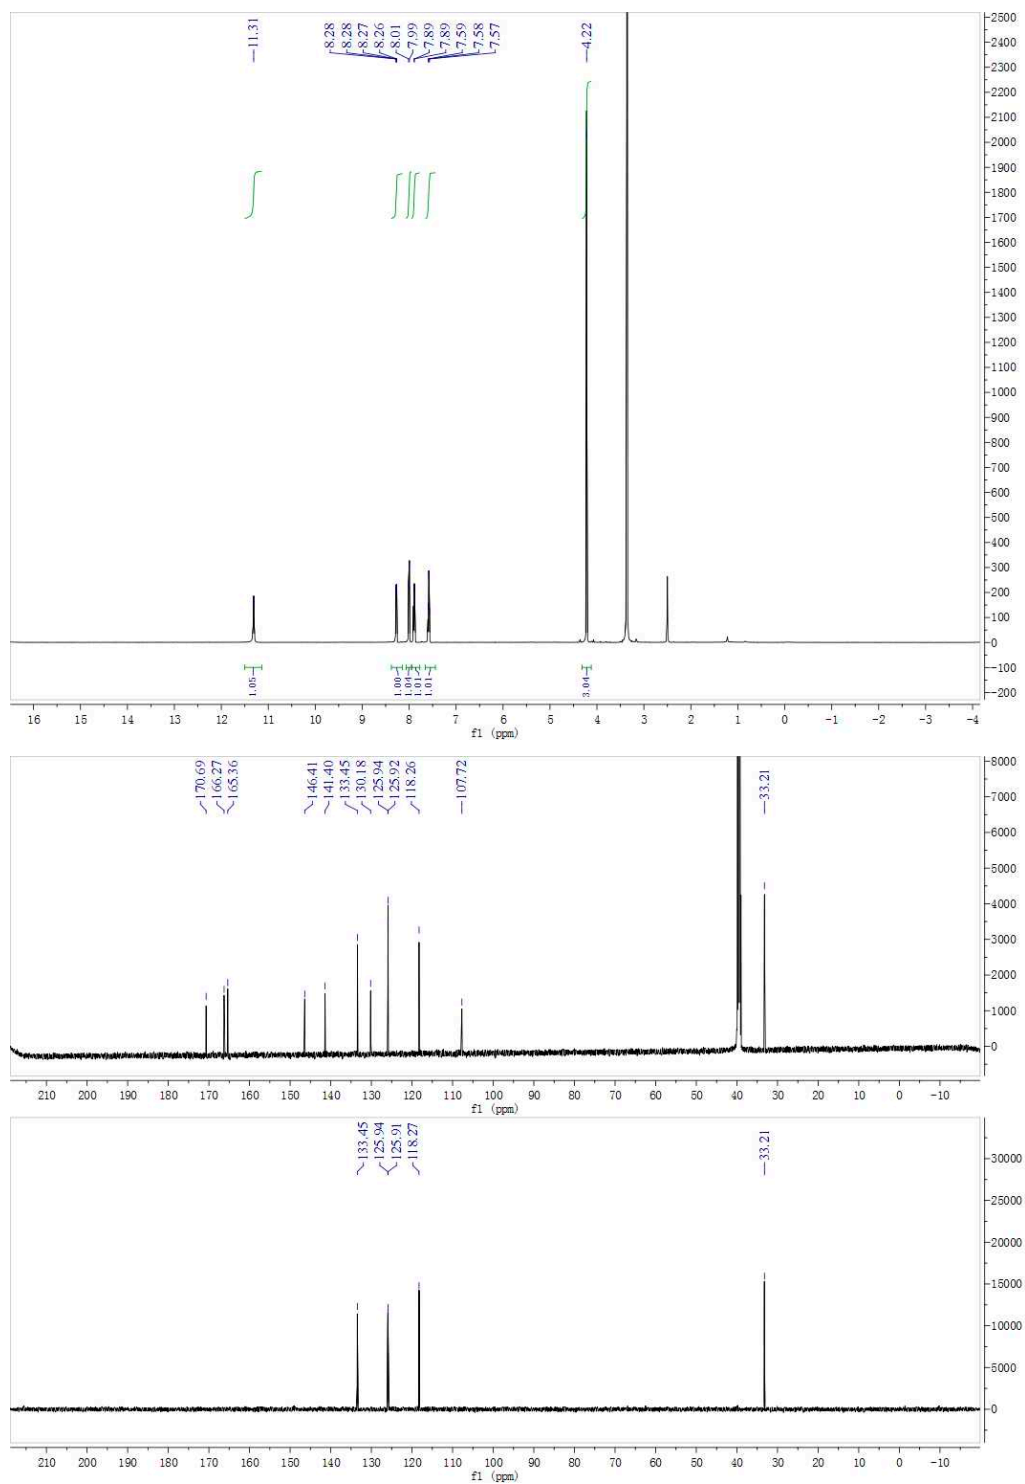

Supplement: s1 [file s1]
